# Supplementary material
Source: HighWire-hosted journal article supplement (https://www.jpn.ca/highwire/filestream/89358/field_highwire_adjunct_files/0/jpn-190005-1-at.pdf)
Supplement: jpn-190005-1-at.pdf [file jpn-190005-1-at.pdf]

**Appendix 1** to Ritter P, Wieland F, Skene DJ, et al. Melatonin suppression by melanopsin-weighted light in patients with bipolar I disorder compared to healthy controls. *J Psychiatry Neurosci* 2019.

DOI: 10.1503/jpn.190005

Copyright © 2019 The Author(s) or their employer(s). To receive this resource in an accessible format, please contact us at [cmajgroup@cmaj.ca](mailto:cmajgroup@cmaj.ca).

*Online appendices are unedited and posted as supplied by the authors.*

### SUPPLEMENT 1:

a)

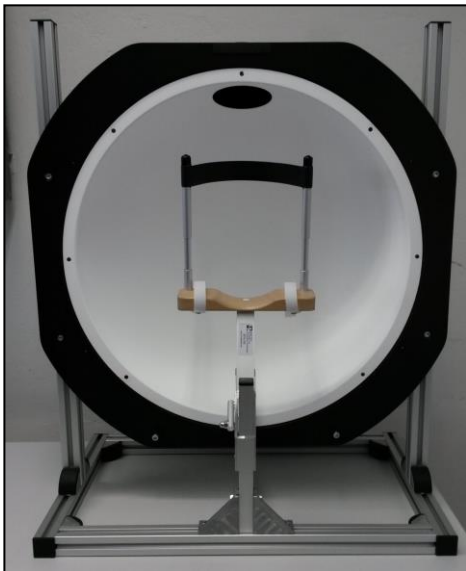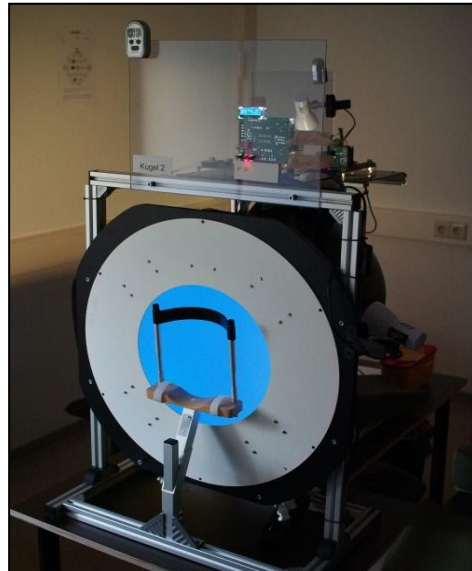

**Appendix 1** to Ritter P, Wieland F, Skene DJ, et al. Melatonin suppression by melanopsin-weighted light in patients with bipolar I disorder compared to healthy controls. *J Psychiatry Neurosci* 2019.

DOI: 10.1503/jpn.190005

*Online appendices are unedited and posted as supplied by the authors.*

b)

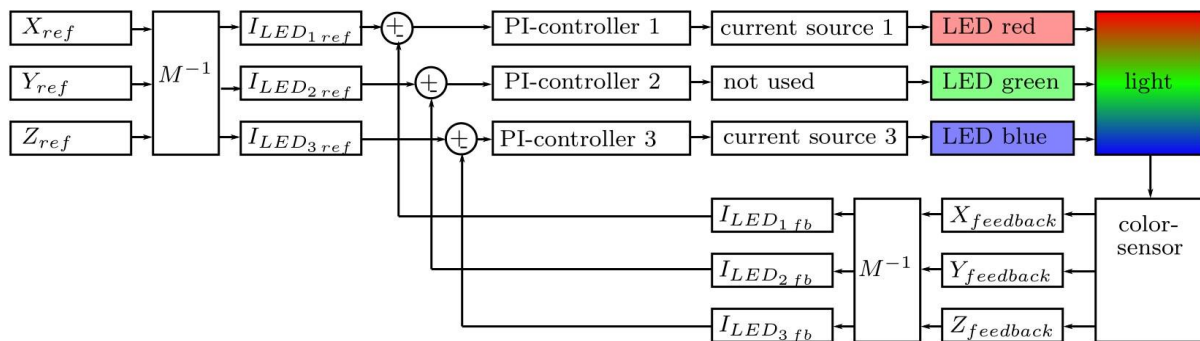

Supplement 1:

- a) Ganzfeld dome, barium sulfate coated hemisphere (Ø 50 cm)
- b) Electrical signalling circuit providing a negative feedback loop for LED adjustment

**Appendix 1** to Ritter P, Wieland F, Skene DJ, et al. Melatonin suppression by melanopsin-weighted light in patients with bipolar I disorder compared to healthy controls. *J Psychiatry Neurosci* 2019.

DOI: 10.1503/jpn.190005

*Online appendices are unedited and posted as supplied by the authors.*

**SUPPLEMENT 2:**

|                                  | <b>df</b> | <b>Mean square</b> | <b>F</b> | <b>p-value</b> |
|----------------------------------|-----------|--------------------|----------|----------------|
| <b>Constant Term</b>             | 1         | 712696             | 33.853   | 0.000          |
| <b>Mood Stabilizer (Li, VLP)</b> | 1         | 8942               | .425     | 0.519          |
| <b>Error</b>                     | 31        | 21052              |          |                |

Supplement 2a: Repeated measures ANCOVA comparing serum melatonin concentration (pg/ml) under dark conditions between BP participants with and without intake of mood stabilizer (Li=lithium, VLP=valproate).

|                                     | <b>Mood stabilizer (Li, VLP)</b> | <b>N</b> | <b>Mean</b> | <b>SD</b> | <b>p-value</b> |
|-------------------------------------|----------------------------------|----------|-------------|-----------|----------------|
| <b>Relative suppression (%)</b>     | -                                | 11       | 12          | 22        | 0.341          |
|                                     | +                                | 19       | 01          | 46        |                |
| <b>Absolute suppression (pg/ml)</b> | -                                | 11       | 20.6        | 34.1      | 0.972          |
|                                     | +                                | 19       | 19.9        | 54.0      |                |

Supplement 2b: Melatonin suppression due to blue light administration in BP participants with and without intake of mood stabilizer (Li=lithium, VLP=valproate).

**Appendix 1** to Ritter P, Wieland F, Skene DJ, et al. Melatonin suppression by melanopsin-weighted light in patients with bipolar I disorder compared to healthy controls. *J Psychiatry Neurosci* 2019.

DOI: 10.1503/jpn.190005

*Online appendices are unedited and posted as supplied by the authors.*

Supplement 3:

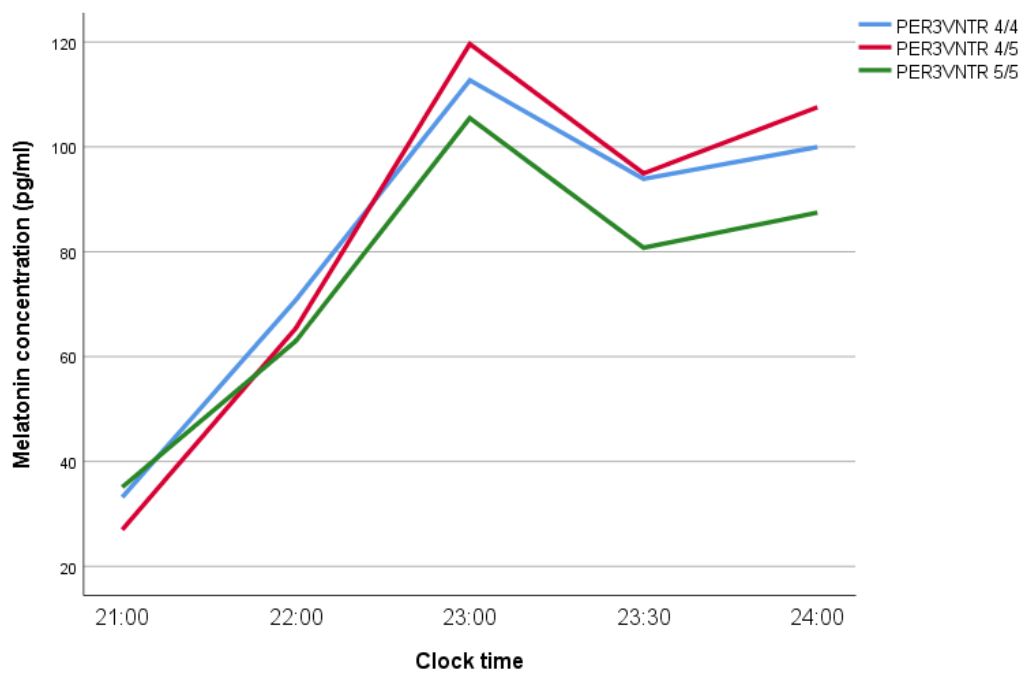

Supplement 3: Melatonin suppression by narrow bandwidth blue light between 23.00 -23.30 h in groups with different *PER3* VNTR polymorphisms.

**Appendix 1** to Ritter P, Wieland F, Skene DJ, et al. Melatonin suppression by melanopsin-weighted light in patients with bipolar I disorder compared to healthy controls. *J Psychiatry Neurosci* 2019.

DOI: 10.1503/jpn.190005

*Online appendices are unedited and posted as supplied by the authors.*

**SUPPLEMENT 4:**

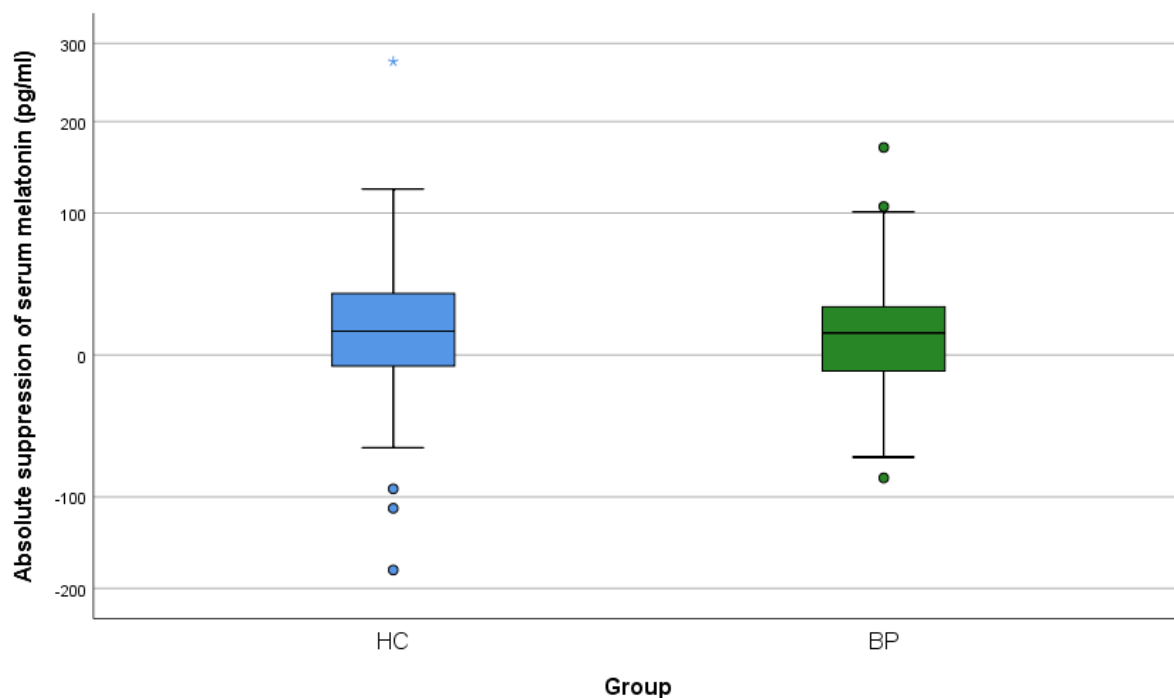

Supplement 4: Box plots of absolute suppression of serum melatonin (pg/ml) by narrow bandwidth blue light. Positive values denote stronger suppression. Y-axis logarithmically scaled for illustration purposes. HC=healthy controls, BP = participants with bipolar disorder

**Appendix 1** to Ritter P, Wieland F, Skene DJ, et al. Melatonin suppression by melanopsin-weighted light in patients with bipolar I disorder compared to healthy controls. *J Psychiatry Neurosci* 2019.

DOI: 10.1503/jpn.190005

*Online appendices are unedited and posted as supplied by the authors.*

**SUPPLEMENT 5:**

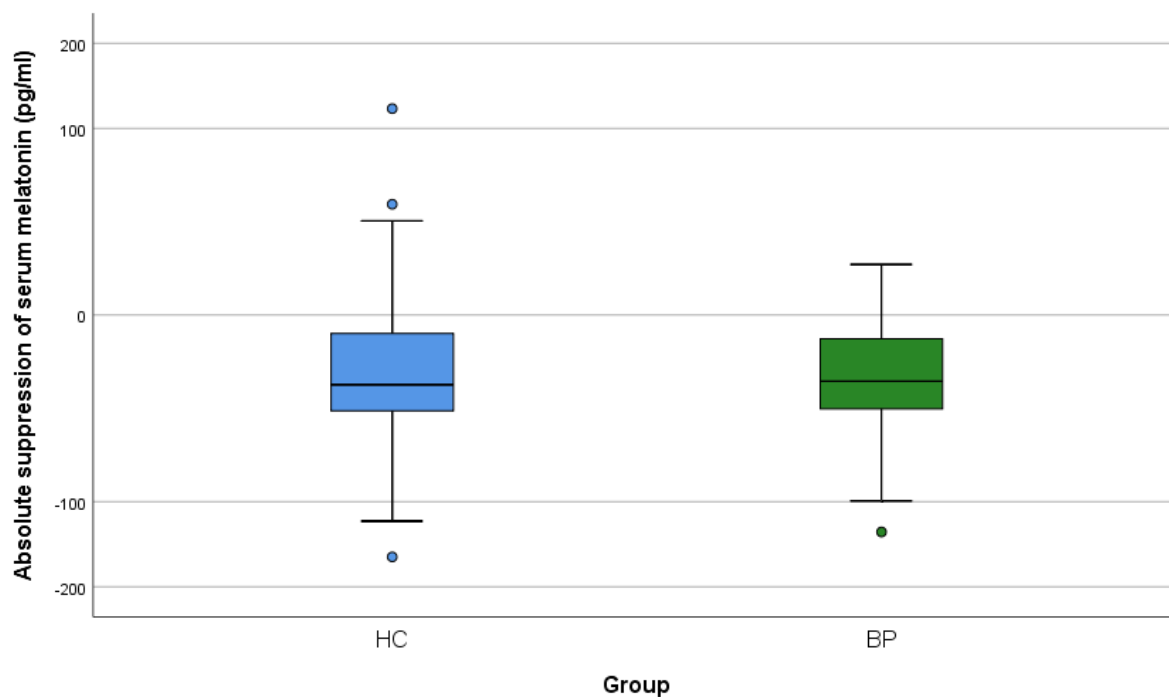

Supplement 5: Box plots of absolute suppression of serum melatonin (pg/ml) by narrow bandwidth red light. Positive values denote stronger suppression. Y-axis logarithmically scaled for illustration purposes. HC=healthy controls, BP = participants with bipolar disorder

**Appendix 1** to Ritter P, Wieland F, Skene DJ, et al. Melatonin suppression by melanopsin-weighted light in patients with bipolar I disorder compared to healthy controls. *J Psychiatry Neurosci* 2019.

DOI: 10.1503/jpn.190005

*Online appendices are unedited and posted as supplied by the authors.*

**SUPPLEMENT 6:**

|                         | Melatonin concentration (pg/ml) 21:00 | Melatonin concentration (pg/ml) 22:00 | Melatonin concentration (pg/ml) 23:00 | Melatonin concentration (pg/ml) 23:30 | Melatonin concentration (pg/ml) 24:00 | Relative suppression (blue) 23.00-23.30 |
|-------------------------|---------------------------------------|---------------------------------------|---------------------------------------|---------------------------------------|---------------------------------------|-----------------------------------------|
| Correlation Coefficient | 0.155                                 | 0.161                                 | 0.078                                 | 0.003                                 | -0.003                                | -0.047                                  |
| Sig. (2-sided)          | 0.169                                 | 0.151                                 | 0.491                                 | 0.981                                 | 0.978                                 | 0.692                                   |
| N                       | 80                                    | 81                                    | 80                                    | 79                                    | 80                                    | 75                                      |

Supplement 6: Spearman correlations of MEQ with melatonin concentration (pg/ml) at different time points and relative suppression by blue light between 23:00-23:30 h.

**Appendix 1** to Ritter P, Wieland F, Skene DJ, et al. Melatonin suppression by melanopsin-weighted light in patients with bipolar I disorder compared to healthy controls. *J Psychiatry Neurosci* 2019.

DOI: 10.1503/jpn.190005

*Online appendices are unedited and posted as supplied by the authors.*

**SUPPLEMENT 7:**

| <b>Distribution</b>            |    |
|--------------------------------|----|
| <i>PER3</i> VNTR repeat number | N  |
| <i>PER3</i> 4/4                | 33 |
| <i>PER3</i> 4/5                | 37 |
| <i>PER3</i> 5/5                | 10 |

|                           | df | mean square | F    | p    |
|---------------------------|----|-------------|------|------|
| Corrected model           | 2  | .171        | .611 | .546 |
| Constant term             | 1  | .064        | .228 | .634 |
| <i>PER3</i> VNTR          | 2  | .171        | .611 | .546 |
| error                     | 77 | .280        |      |      |
| total                     | 80 |             |      |      |
| Corrected total variation | 79 |             |      |      |

Supplement 7: Linear regression model for *PER3* VNTR genotype as the independent variable and relative suppression by blue light between 23:00-23:30 h as the dependent variable.



**Appendix 1** to Ritter P, Wieland F, Skene DJ, et al. Melatonin suppression by melanopsin-weighted light in patients with bipolar I disorder compared to healthy controls. *J Psychiatry Neurosci* 2019.

DOI: 10.1503/jpn.190005

*Online appendices are unedited and posted as supplied by the authors.*

**SUPPLEMENT 8:**

| <b>Blue light:</b><br>Human retinal photopigment complement (all weighted) |                    |                                    |                                     |
|----------------------------------------------------------------------------|--------------------|------------------------------------|-------------------------------------|
| <b>Prefix</b>                                                              | <b>Sensitivity</b> | <b><math>\lambda_{\max}</math></b> | <b><math>\alpha</math>-opic lux</b> |
| Cyanopic                                                                   | S cone             | 419.0                              | 29.4                                |
| Melanopic                                                                  | Melanopsin         | 480.0                              | 49.1                                |
| Rhodopic                                                                   | Rod                | 496.3                              | 36.3                                |
| Chloropic                                                                  | M cone             | 530.8                              | 20.0                                |
| Erythropic                                                                 | L cone             | 558.4                              | 11.0                                |

Supplement 8a: Photoreceptor specific illuminance values for the blue for the blue light condition

$\lambda_{\max}$ =absorption maximum ;  $\alpha$ -opic lux=photoreceptor specific illuminance value calculated using the "Irradiance Toolbox" <sup>37</sup>

| <b>Red light:</b><br>Human retinal photopigment complement (all weighted) |                    |                                    |                                     |
|---------------------------------------------------------------------------|--------------------|------------------------------------|-------------------------------------|
| <b>Prefix</b>                                                             | <b>Sensitivity</b> | <b><math>\lambda_{\max}</math></b> | <b><math>\alpha</math>-opic lux</b> |
| Cyanopic                                                                  | S cone             | 419.0                              | 0.11                                |
| Melanopic                                                                 | Melanopsin         | 480.0                              | 0.09                                |
| Rhodopic                                                                  | Rod                | 496.3                              | 0.26                                |
| Chloropic                                                                 | M cone             | 530.8                              | 3.29                                |
| Erythropic                                                                | L cone             | 558.4                              | 12.2                                |

Supplement 8b: Photoreceptor specific illuminance values for the blue for the red light condition

$\lambda_{\max}$ =absorption maximum ;  $\alpha$ -opic lux= photoreceptor specific illuminance value calculated using the "Irradiance Toolbox" <sup>37</sup>
